# Supplementary material
Source: ML conference proceedings conference paper supplement (https://openaccess.thecvf.com/content/ICCV2025/html/Jiang_MonoMVSNet_Monocular_Priors_ICCV_2025_paper.html)
Supplement: Supplementary file 1 [file Jiang_MonoMVSNet_Monocular_Priors_ICCV_2025_supplemental.pdf]

# MonoMVSNet: Monocular Priors Guided Multi-View Stereo Network

## Supplementary Material

### A. Details of Camera Embedding

The details of camera embedding module are as follows. The warped feature ( $B \times C \times D \times H \times W$ ) is reshaped to  $B \times CD \times H \times W$  and further processed by Conv $\rightarrow$ BN $\rightarrow$ ReLU layers to produce the output with shape  $B \times C \times H \times W$ . The camera parameters ( $B \times 4 \times 4$ ) is reshaped to  $B \times 16$ , processed by a BN layer, and mapped to  $B \times C$  by an MLP, which is further reshaped to  $B \times C \times 1 \times 1$ . The two features ( $B \times C \times H \times W$  and  $B \times C \times 1 \times 1$ ) are added together with broadcast, which is further processed by Squeeze-and-Excitation [4] $\rightarrow$ Conv layers. The output is  $B \times C \times H \times W$ , which then add to the corresponding feature.

### B. More Ablation Study

**Compatibility with Monocular Foundation Models.** To fairly verify the applicability of our method to different monocular foundation models, we replace Depth Anything V2 [10] with other ViT-small version monocular foundation models: DINO V2 [7], Depth Anything V1 [9], and Depth Pro [2]. As shown in Tab. 1, all alternative monocular foundation models exhibit significant improvements in both point cloud and depth performance, among which Depth Anything V2 achieves the best results. This further confirms the generalization capability of our method.

| Models                 | Overall $\downarrow$ | Acc. $\downarrow$ | Comp. $\downarrow$ | MAE $\downarrow$ |
|------------------------|----------------------|-------------------|--------------------|------------------|
| Depth Pro [2]          | 0.286                | 0.316             | 0.256              | 5.78             |
| DINO V2 [7]            | 0.284                | 0.311             | 0.257              | 5.50             |
| Depth Anything V1 [9]  | 0.282                | 0.299             | 0.265              | 5.03             |
| Depth Anything V2 [10] | 0.278                | 0.313             | 0.243              | 4.99             |

Table 1. Ablation study on different monocular foundation models.

**Number of Views.** As shown in Tab. 2, we show the impact of the number of input views. Multi-view information helps alleviate problems such as occlusions, and the reconstruction quality progressively improves with an increasing number of views, saturating at 9 views.

**Positional Encoding Design.** We replace Cross-View Positional Encoding (CVPE) with an MLP to map the traditional 2D positional encoding. As shown in Fig. 3, the Overall $\downarrow$  metric (0.278 $\rightarrow$ 0.285), demonstrating the effectiveness our proposed CVPE.

### C. More Visualization Results

Fig. 1 present our method achieves better accuracy and recall in textureless regions and depth discontinuous edge re-

| $N$ | Overall $\downarrow$ | Acc. $\downarrow$ | Comp. $\downarrow$ |
|-----|----------------------|-------------------|--------------------|
| 4   | 0.2825               | 0.315             | 0.250              |
| 5   | 0.2780               | 0.313             | <b>0.243</b>       |
| 6   | 0.2765               | 0.309             | 0.244              |
| 7   | 0.2760               | 0.307             | 0.245              |
| 8   | 0.2755               | 0.304             | 0.247              |
| 9   | <b>0.2750</b>        | 0.302             | 0.248              |
| 10  | 0.2755               | <b>0.299</b>      | 0.252              |

Table 2. Ablation study on the number of input views  $N$ .

| Position Encoding | Overall $\downarrow$ | MAE $\downarrow$ |
|-------------------|----------------------|------------------|
| w/ 2D PE+MLP      | 0.285                | 5.29             |
| w/ 2D PE+CVPE     | 0.278                | 4.99             |

Table 3. Ablation on position encoding design.

gions on the Tanks-and-Temples benchmark [5]. Figure 2 presents the depth map comparison results from the ablation experiments on the DTU [1] dataset. Figures 3 and 4 visualize the reconstructed point clouds on the DTU and Tanks-and-Temples benchmark, respectively.

## References

- [1] Henrik Aanæs, Rasmus Ramsbøl Jensen, George Vogiatzis, Engin Tola, and Anders Bjarholm Dahl. Large-scale data for multiple-view stereopsis. *International Journal of Computer Vision*, 120:153–168, 2016. 1, 3, 4
- [2] Aleksei Bochkovskii, Amaël Delaunoy, Hugo Germain, Marcel Santos, Yichao Zhou, Stephan R Richter, and Vladlen Koltun. Depth pro: Sharp monocular metric depth in less than a second. *arXiv preprint arXiv:2410.02073*, 2024. 1
- [3] Chenjie Cao, Xinlin Ren, and Yanwei Fu. Mvsformer++: Revealing the devil in transformer’s details for multi-view stereo. *arXiv preprint arXiv:2401.11673*, 2024. 2
- [4] Jie Hu, Li Shen, and Gang Sun. Squeeze-and-excitation networks. In *Proceedings of the IEEE conference on computer vision and pattern recognition*, pages 7132–7141, 2018. 1
- [5] Arno Knapitsch, Jaesik Park, Qian-Yi Zhou, and Vladlen Koltun. Tanks and temples: Benchmarking large-scale scene reconstruction. *ACM Transactions on Graphics (ToG)*, 36(4):1–13, 2017. 1, 2, 5
- [6] Tianqi Liu, Xinyi Ye, Weiyue Zhao, Zhiyu Pan, Min Shi, and Zhiguo Cao. When epipolar constraint meets non-local operators in multi-view stereo. In *Proceedings of the IEEE/CVF International Conference on Computer Vision*, pages 18088–18097, 2023. 2
- [7] Maxime Oquab, Timothée Darcet, Théo Moutakanni, Huy

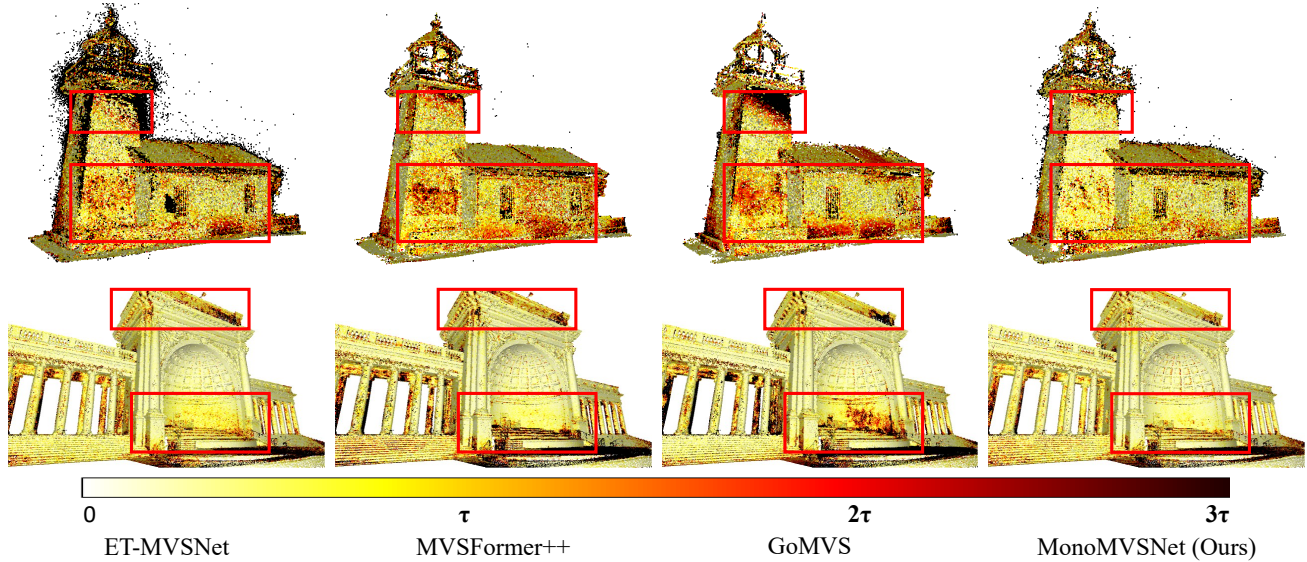

Figure 1. Qualitative comparison of reconstructed point clouds with ET-MVSNet [6], MVSFomrer++ [3], and GoMVS [8] on Tanks-and-Temples [5] benchmark. Brighter areas in the figure indicate smaller errors associated with the distance threshold ( $\tau$ ). The top row shows the Precision for the Lighthouse in the advanced subset ( $\tau = 5mm$ ), the bottom row shows the Recall for the Temple in the intermediate subset ( $\tau = 15mm$ ).

Vo, Marc Szafraniec, Vasil Khalidov, Pierre Fernandez, Daniel Haziza, Francisco Massa, Alaaeldin El-Nouby, et al. Dinov2: Learning robust visual features without supervision. *arXiv preprint arXiv:2304.07193*, 2023. 1

- [8] Jiang Wu, Rui Li, Hao-fei Xu, Wenxun Zhao, Yu Zhu, Jinqiu Sun, and Yanning Zhang. Gomvs: Geometrically consistent cost aggregation for multi-view stereo. In *Proceedings of the IEEE/CVF Conference on Computer Vision and Pattern Recognition*, pages 20207–20216, 2024. 2
- [9] Lihe Yang, Bingyi Kang, Zilong Huang, Xiaogang Xu, Jiashi Feng, and Hengshuang Zhao. Depth anything: Unleashing the power of large-scale unlabeled data. In *Proceedings of the IEEE/CVF Conference on Computer Vision and Pattern Recognition*, pages 10371–10381, 2024. 1
- [10] Lihe Yang, Bingyi Kang, Zilong Huang, Zhen Zhao, Xiaogang Xu, Jiashi Feng, and Hengshuang Zhao. Depth anything v2. *arXiv preprint arXiv:2406.09414*, 2024. 1

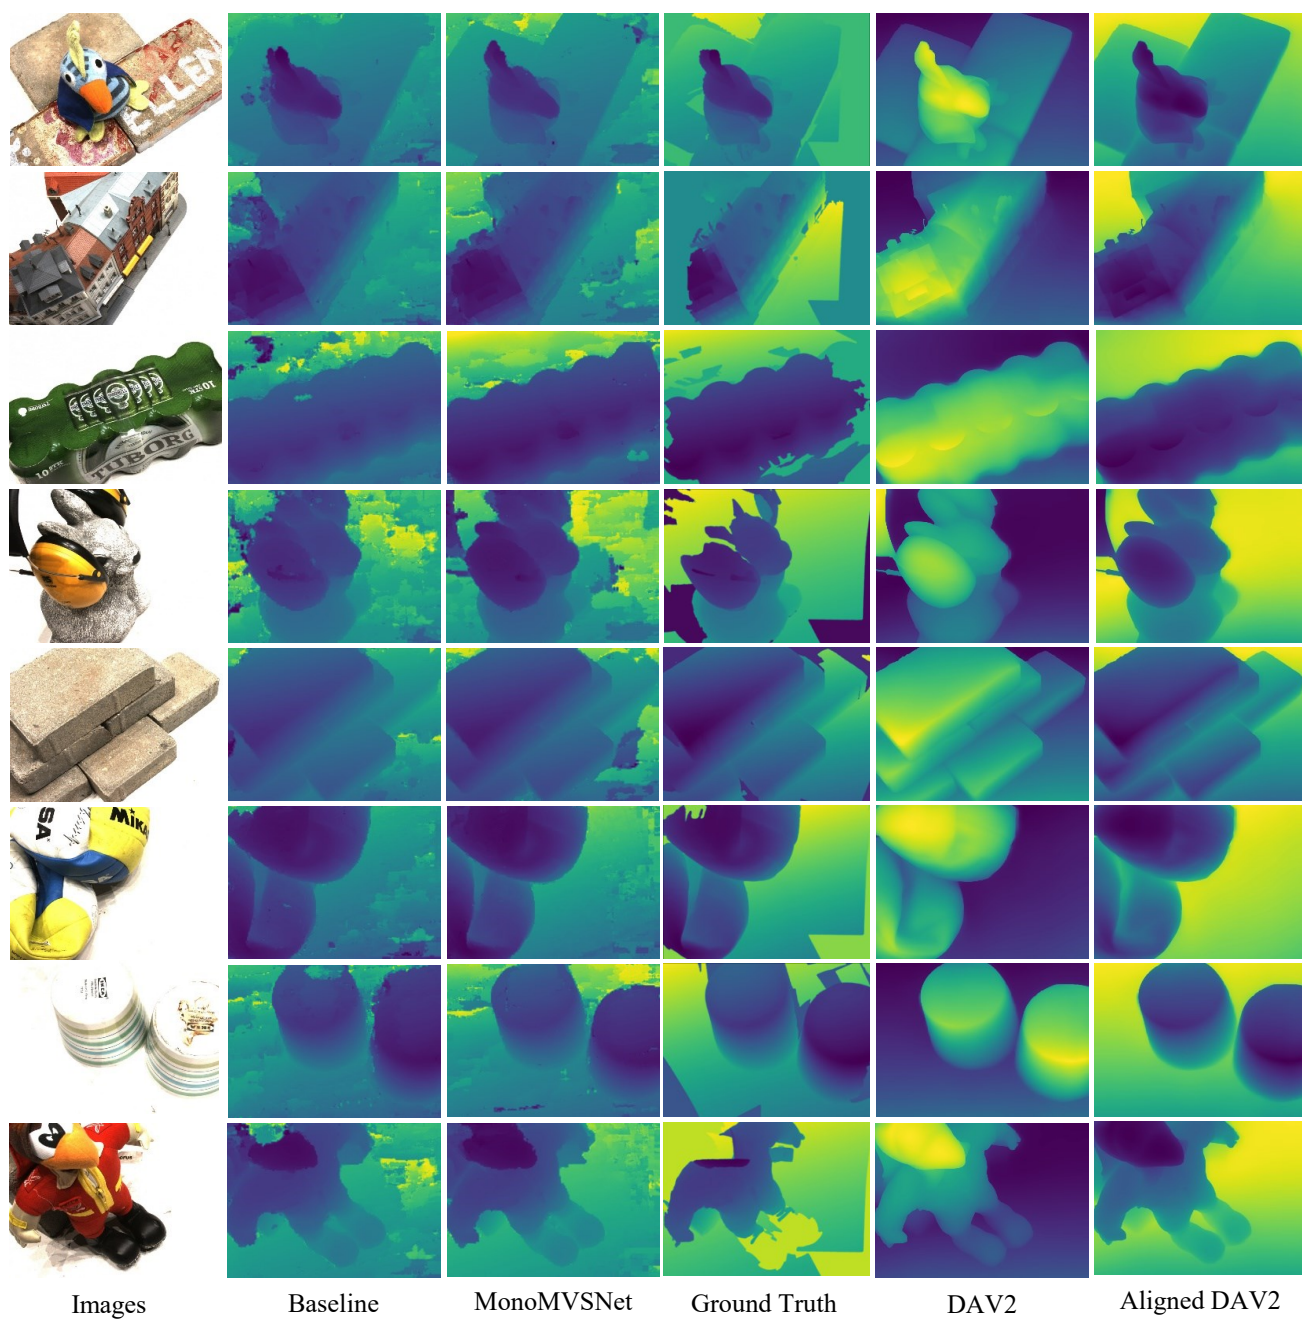

Figure 2. Additional depth maps visualization comparing the Baseline, MonoMVSNet, Ground Truth, Depth Anything V2 (DAV2), and Aligned DAV2 on the DTU [1] dataset.



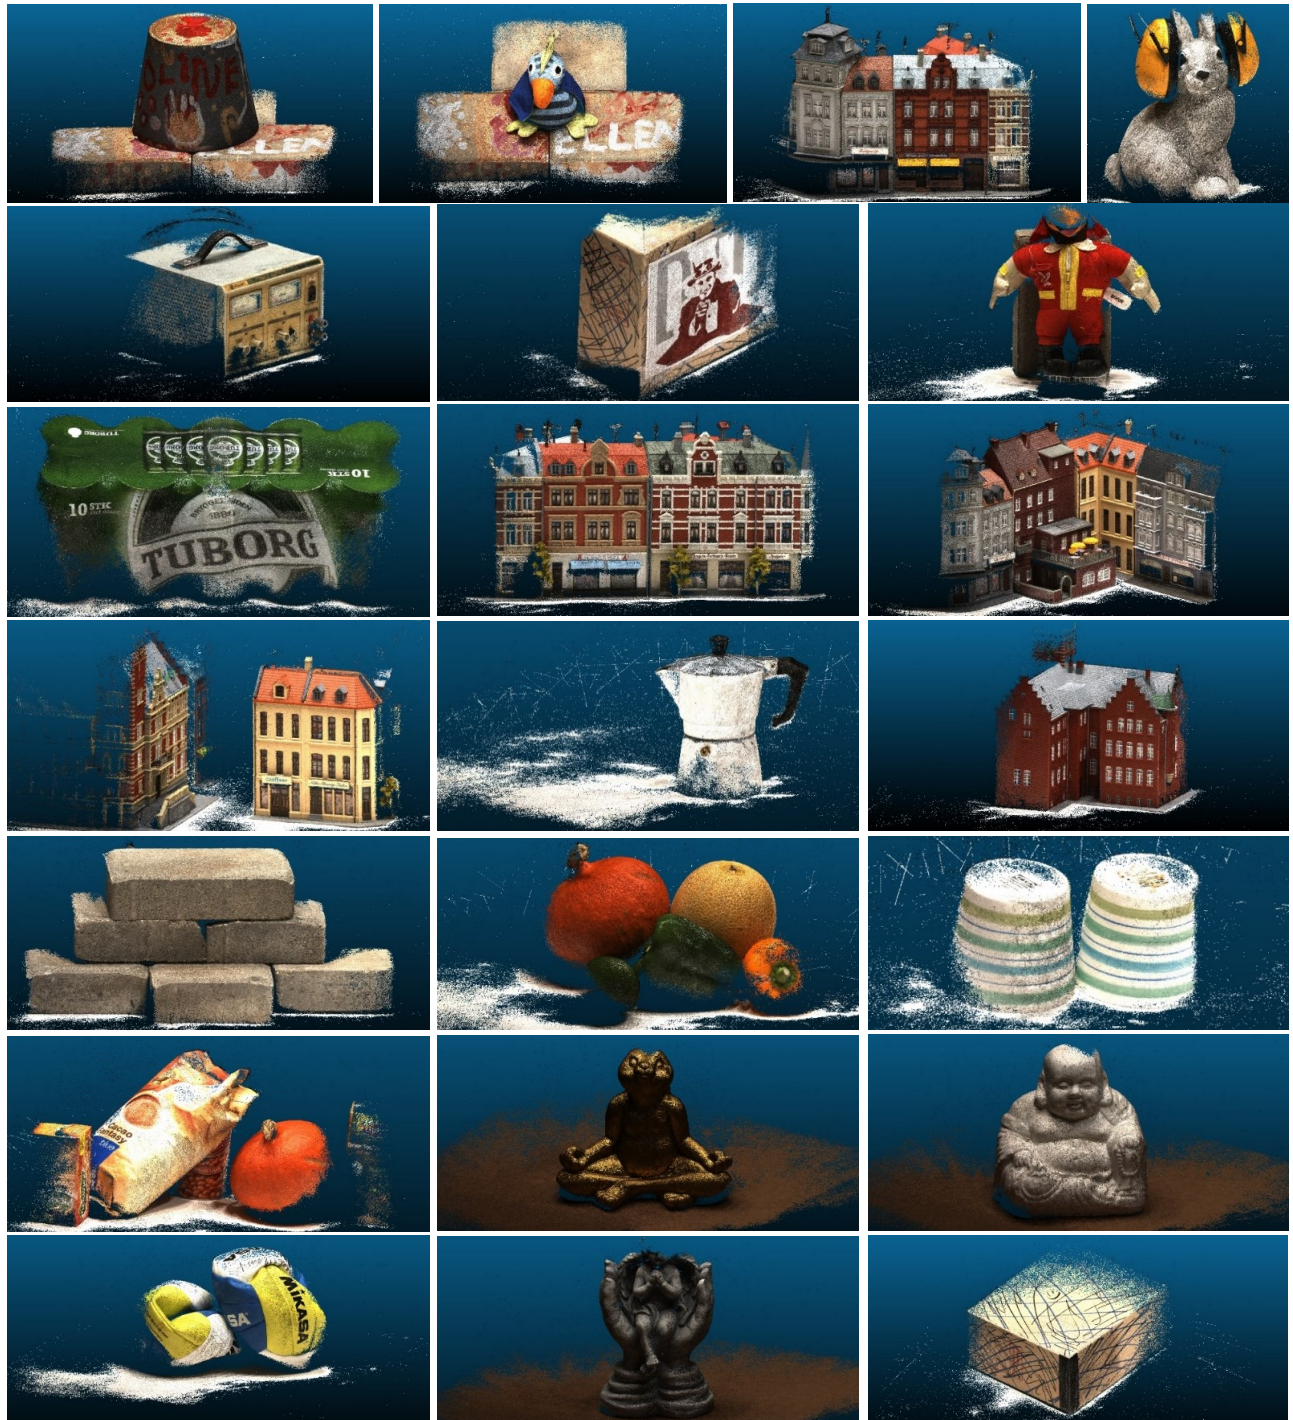

Figure 3. More visualization results of all reconstructed point clouds on the DTU [1] dataset.



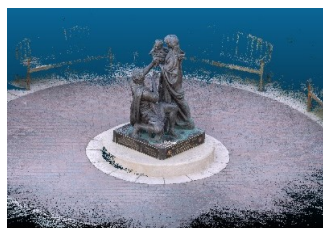

Family

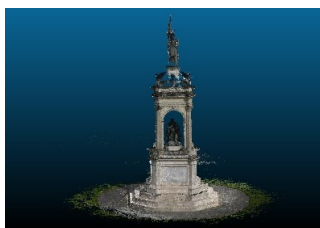

Francis

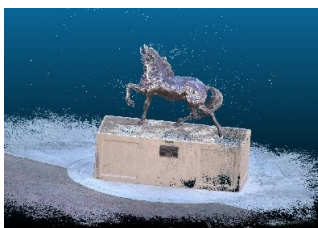

Horse

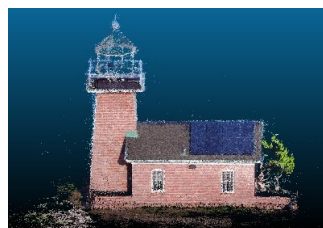

Light House

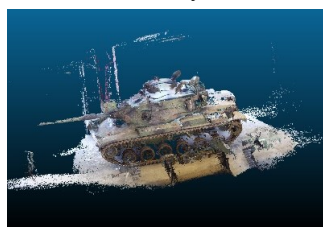

M60

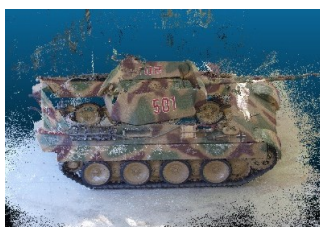

Panther

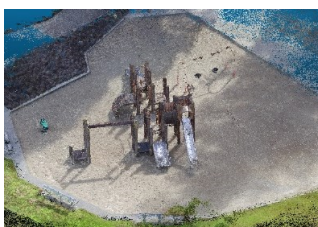

Playground

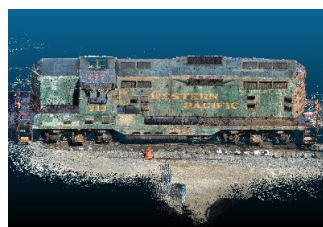

Train

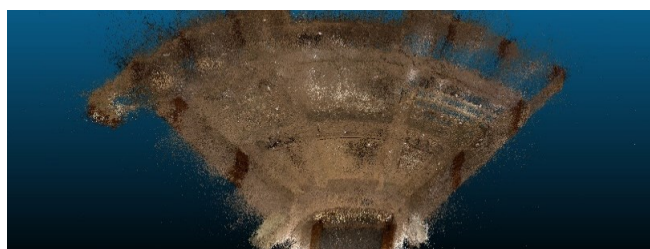

Auditorium

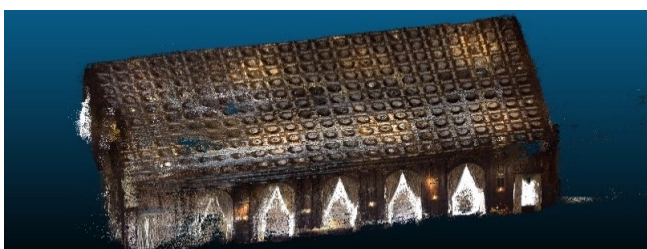

Ballroom

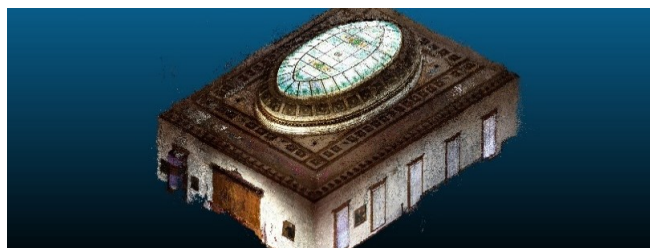

Courtroom

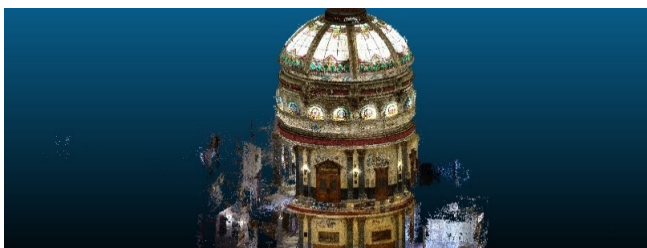

Museum

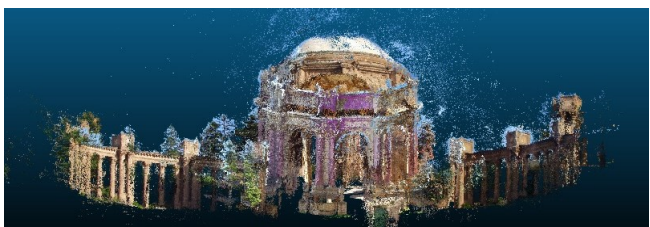

Palace

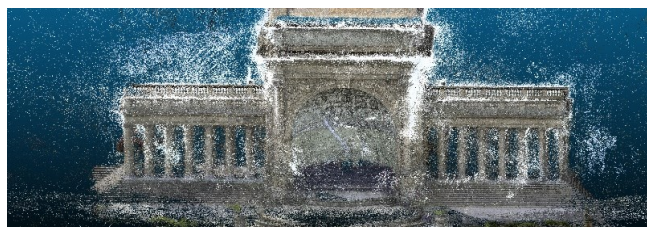

Temple

Figure 4. More visualization results of all reconstructed point clouds on the Tanks-and-Temples [5] benchmark.
